# Supplementary material
Source: MDPI journal article supplement (https://www.mdpi.com/2411-5142/8/1/4)
Supplement: s1 [file s1]

**Supplementary Materials—Journal of Functional Morphology and Kinesiology**  
**Shaping exploration: How does the Constraint-Induced Movement Therapy helps patients finding**  
**a new movement solution**

Matheus M. Pacheco<sup>1\*</sup>, Luisa F. García-Salazar<sup>2</sup>, Laura H. S. C. Gomes<sup>3</sup>, Fabiana S. Marques<sup>4</sup>, and Natalia D. Pereira<sup>3</sup>

<sup>1</sup> CIFI2D. Faculty of Sport. University of Porto - Portugal

<sup>2</sup> Rehabilitation Science Research Group. School of Medicine and Health Sciences. Universidad del Rosario – Colombia

<sup>3</sup> Department of Physiotherapy. Federal University of São Carlos (UFSCar) – Brazil

<sup>4</sup> Motor Development Group. Department of Physical Education. Federal University of Rondônia (UNIR) – Brazil

**Performance Measures**

**Descriptive Measures**

**Table S1.** Average clearing height (cm) of each participant per block of ten movements (B) and step height (S)

| Part. | B1S1 | B2S1 | B3S1  | B4S1 | B5S1 | B1S2 | B2S2  | B3S2  | B4S2  | B5S2  |
|-------|------|------|-------|------|------|------|-------|-------|-------|-------|
| 1     | 5.84 | 6.54 | 5.81  | 6.95 | 6.64 | 5.11 | 4.24  | 4.21  | 4.01  | 4.71  |
| 2     | 7.20 | 7.36 | -     | 7.27 | 6.20 | 6.24 | 6.46  | 6.88  | 6.15  | 5.93  |
| 3     | 5.48 | 4.76 | 4.02  | 4.43 | 5.88 | 3.01 | 0.15  | 1.46  | 1.56  | 0.75  |
| 4     | -    | -    | 12.94 | -    | -    | -    | 11.23 | 11.64 | 11.80 | 12.58 |

**Table S2.** Average peak foot height (cm) of each participant per block of ten movements (B) and step height (S)

| Part. | B1S1  | B2S1  | B3S1  | B4S1  | B5S1  | B1S2  | B2S2  | B3S2  | B4S2  | B5S2  |
|-------|-------|-------|-------|-------|-------|-------|-------|-------|-------|-------|
| 1     | 49.84 | 50.54 | 49.81 | 50.95 | 50.64 | 54.11 | 53.24 | 53.21 | 54.01 | 53.71 |
| 2     | 31.20 | 31.36 | -     | 31.27 | 30.20 | 32.74 | 32.96 | 33.38 | 32.65 | 32.43 |
| 3     | 20.48 | 19.76 | 19.02 | 19.43 | 20.88 | 22.51 | 19.65 | 20.96 | 21.06 | 20.25 |
| 4     | -     | -     | 30.94 | -     | -     | -     | 32.23 | 32.64 | 32.80 | 33.58 |

**Table S3.** Average hip joint angle at peak foot height (degrees) of each participant per block of ten movements (B) and step height (S)

| Part. | B1S1  | B2S1  | B3S1  | B4S1  | B5S1  | B1S2  | B2S2  | B3S2  | B4S2  | B5S2  |
|-------|-------|-------|-------|-------|-------|-------|-------|-------|-------|-------|
| 1     | 68.50 | 68.19 | 64.95 | 64.59 | 64.95 | 73.48 | 73.21 | 74.20 | 71.57 | 70.07 |
| 2     | 58.59 | 55.74 | -     | 59.02 | 56.63 | 58    | 58.72 | 60.38 | 59.68 | 61.58 |
| 3     | 68.86 | 71.03 | 69.50 | 70.78 | 73.08 | 74.05 | 72.98 | 74.26 | 75.22 | 76.24 |
| 4     | -     | -     | 90.50 | -     | -     | -     | 94.18 | 95.75 | 98.27 | 99.67 |

**Table S4.** Average knee joint angle at peak foot height (degrees) of each participant per block of ten movements (B) and step height (S)

| Part. | B1S1    | B2S1    | B3S1    | B4S1    | B5S1    | B1S2    | B2S2    | B3S2    | B4S2    | B5S2    |
|-------|---------|---------|---------|---------|---------|---------|---------|---------|---------|---------|
| 1     | -121.96 | -123.38 | -124.04 | -124.02 | -123.66 | -123.13 | -116.57 | -112.09 | -118.02 | -115.35 |
| 2     | -90.98  | -92.76  | -       | -89.41  | -86.78  | -93.82  | -93.01  | -95.81  | -93.68  | -91.79  |
| 3     | -77.04  | -69.60  | -74.64  | -74.38  | -77.60  | -82.68  | -71.25  | -74.24  | -74.08  | -68.89  |
| 4     | -       | -       | -83.31  | -       | -       | -       | -79.57  | -81.94  | -80.61  | -86.53  |

**Table S5.** Average ankle joint angle at peak foot height (degrees) of each participant per block of ten movements (B) and step height (S)

| Part. | B1S1  | B2S1  | B3S1  | B4S1  | B5S1  | B1S2  | B2S2  | B3S2  | B4S2  | B5S2  |
|-------|-------|-------|-------|-------|-------|-------|-------|-------|-------|-------|
| 1     | 22.98 | 22.71 | 22.45 | 22.39 | 22.53 | 22.36 | 21.36 | 20.11 | 21.34 | 21.73 |
| 2     | 25.34 | 25.32 | -     | 24.79 | 24.44 | 26.33 | 25.59 | 25.31 | 25.64 | 24.92 |
| 3     | 15.28 | 12.84 | 14.47 | 12.11 | 11.14 | 14.85 | 13.65 | 11.29 | 11.11 | 11.18 |
| 4     | -     | -     | 3.130 | -     | -     | -     | 1.900 | 1.670 | 2.010 | 1.820 |

**Table S6.** Average hip joint range of motion (degrees) of each participant per block of ten movements (B) and step height (S)

| Part. | B1S1  | B2S1  | B3S1  | B4S1  | B5S1  | B1S2  | B2S2  | B3S2  | B4S2  | B5S2  |
|-------|-------|-------|-------|-------|-------|-------|-------|-------|-------|-------|
| 1     | 69.26 | 71.06 | 67.56 | 66.77 | 66.58 | 72.27 | 70.22 | 71.27 | 70.22 | 71.03 |
| 2     | 54.62 | 59.27 | -     | 57.17 | 56.15 | 59.15 | 57.56 | 59.15 | 56.58 | 59.05 |
| 3     | 47.12 | 46.58 | 47.08 | 48.81 | 48.35 | 51.11 | 48.75 | 52.52 | 51.63 | 53.06 |
| 4     | -     | -     | 58.54 | -     | -     | -     | 60.05 | 60.32 | 62.63 | 60.93 |

**Table S7.** Average knee joint range of motion (degrees) of each participant per block of ten movements (B) and step height (S)

| Part. | B1S1   | B2S1   | B3S1   | B4S1   | B5S1   | B1S2   | B2S2   | B3S2  | B4S2   | B5S2   |
|-------|--------|--------|--------|--------|--------|--------|--------|-------|--------|--------|
| 1     | 109.53 | 112.91 | 110.41 | 112.93 | 109.93 | 110.79 | 107.55 | 107.8 | 109.95 | 111.05 |
| 2     | 91.01  | 94.44  | -      | 92.30  | 90.47  | 97.62  | 94.77  | 97.06 | 92.14  | 92.85  |
| 3     | 76.17  | 70.91  | 70.89  | 74.20  | 72.40  | 79.86  | 73.54  | 76.50 | 72.77  | 74.57  |
| 4     | -      | -      | 71.37  | -      | -      | -      | 71.71  | 74.88 | 78.33  | 86.45  |

**Table S8.** Average ankle joint range of motion (degrees) of each participant per block of ten movements (B) and step height (S)

| Part. | B1S1  | B2S1  | B3S1  | B4S1  | B5S1  | B1S2  | B2S2  | B3S2  | B4S2  | B5S2  |
|-------|-------|-------|-------|-------|-------|-------|-------|-------|-------|-------|
| 1     | 21.54 | 19.96 | 20.05 | 20.40 | 19.18 | 21.29 | 19.93 | 22.05 | 22    | 23.23 |
| 2     | 28.99 | 25.96 | -     | 26.02 | 24.17 | 27.61 | 26.72 | 25.34 | 25.14 | 26.29 |
| 3     | 21    | 21.84 | 22.05 | 23.12 | 23.76 | 22.56 | 21.67 | 25.70 | 23.40 | 21.84 |
| 4     | -     | -     | 11.82 | -     | -     | -     | 11.50 | 10.17 | 9.750 | 9.400 |

**Table S9.** Average time (seconds) of each participant during a block of ten movements (B) and step height (S)

| Part. | B1S1  | B2S1  | B3S1  | B4S1  | B5S1  | B1S2  | B2S2  | B3S2  | B4S2  | B5S2  |
|-------|-------|-------|-------|-------|-------|-------|-------|-------|-------|-------|
| 1     | 26.24 | 29.24 | 25.81 | 28.63 | 25.92 | 26.59 | 24.94 | 26.52 | 26.26 | 27.56 |
| 2     | 35.60 | 39.56 | -     | 35.13 | 34.34 | 45.06 | 33.06 | 31.55 | 30.81 | 28.12 |
| 3     | 40.65 | 39.41 | 38.14 | 41.80 | 42.29 | 49.42 | 44.96 | 47.82 | 45.24 | 44.83 |
| 4     | -     | -     | 33.94 | -     | -     | -     | 23.84 | 22.20 | 22.76 | 18.37 |

### Linear Mixed Effect (LME) Models

**Table S10.** LME for clearing height as a function of blocks and step height ( $R^2 = 0.93$ )

| Variable           | Estimate          | <i>t</i> -stat | DF | <i>p</i> -value |
|--------------------|-------------------|----------------|----|-----------------|
| Intercept          | 7.92              | 4.37           | 30 | < .001          |
| Step Height        | -1.75             | 2.49           | 30 | .032            |
| Blocks             | 0.01              | 0.08           | 30 | .937            |
| Step Height*Blocks | -0.06             | 0.26           | 30 | .794            |
| Intercept (random) | 3.47 <sup>a</sup> |                |    |                 |

<sup>a</sup> The estimate of the random effect represents the standard deviation of the intercept provided differences between individuals

**Table S11.** LME for peak foot height as a function of blocks and step height ( $R^2 = 0.99$ )

| Variable           | Estimate           | <i>t</i> -stat | DF | <i>p</i> -value |
|--------------------|--------------------|----------------|----|-----------------|
| Intercept          | 32.99              | 5.78           | 30 | < .001          |
| Step Height        | 2.24               | 3.49           | 30 | .002            |
| Blocks             | 0.01               | 0.09           | 30 | .931            |
| Step Height*Blocks | -0.07              | 0.37           | 30 | .717            |
| Intercept (random) | 11.38 <sup>a</sup> |                |    |                 |

<sup>a</sup> The estimate of the random effect represents the standard deviation of the intercept provided differences between individuals

**Table S12.** LME for hip joint angle at foot peak height as a function of blocks and step height ( $R^2 = 0.98$ )

| Variable           | Estimate | <i>t</i> -stat | DF | <i>p</i> -value |
|--------------------|----------|----------------|----|-----------------|
| Intercept          | 71.75    | 10.95          | 30 | < .001          |
| Step Height        | 2.66     | 1.83           | 30 | .077            |
| Blocks             | -0.11    | 0.33           | 30 | .743            |
| Step Height*Blocks | 0.58     | 1.34           | 30 | .191            |
| Intercept (random) | 12.92    |                |    |                 |

<sup>a</sup> The estimate of the random effect represents the standard deviation of the intercept provided differences between individuals

**Table S13.** LME for knee joint angle at foot peak height as a function of blocks and step height ( $R^2 = 0.97$ )

| Variable           | Estimate | <i>t</i> -stat | DF | <i>p</i> -value |
|--------------------|----------|----------------|----|-----------------|
| Intercept          | -93.25   | 10.55          | 30 | < .001          |
| Step Height        | -1.40    | 0.48           | 30 | .631            |
| Blocks             | 0.06     | 0.09           | 30 | .924            |
| Step Height*Blocks | 0.86     | 0.99           | 30 | .326            |
| Intercept (random) | 17.16    |                |    |                 |

<sup>a</sup> The estimate of the random effect represents the standard deviation of the intercept provided differences between individuals

**Table S14.** LME for ankle joint angle at foot peak height as a function of blocks and step height ( $R^2 = 0.99$ )

| Variable           | Estimate | <i>t</i> -stat | DF | <i>p</i> -value |
|--------------------|----------|----------------|----|-----------------|
| Intercept          | 17.18    | 3.84           | 30 | < .001          |
| Step Height        | -0.61    | 0.86           | 30 | .392            |
| Blocks             | -0.42    | 2.70           | 30 | .011            |
| Step Height*Blocks | 0.01     | 0.07           | 30 | .943            |
| Intercept (random) | 8.89     |                |    |                 |

<sup>a</sup> The estimate of the random effect represents the standard deviation of the intercept provided differences between individuals

**Table S15.** LME for hip joint range of motion as a function of blocks and step height ( $R^2 = 0.97$ )

| Variable           | Estimate | <i>t</i> -stat | DF | <i>p</i> -value |
|--------------------|----------|----------------|----|-----------------|
| Intercept          | 58.11    | 15.78          | 30 | < .001          |
| Step Height        | 1.83     | 1.59           | 30 | .123            |
| Blocks             | -0.13    | 0.53           | 30 | .601            |
| Step Height*Blocks | 0.29     | 0.84           | 30 | .408            |
| Intercept (random) | 7.16     |                |    |                 |

<sup>a</sup> The estimate of the random effect represents the standard deviation of the intercept provided differences between individuals

**Table S16.** LME for knee joint range of motion as a function of blocks and step height ( $R^2 = 0.96$ )

| Variable           | Estimate | <i>t</i> -stat | DF | <i>p</i> -value |
|--------------------|----------|----------------|----|-----------------|
| Intercept          | 88.35    | 11.70          | 30 | < .001          |
| Step Height        | 0.57     | 0.23           | 30 | .823            |
| Blocks             | -0.22    | 0.40           | 30 | .693            |
| Step Height*Blocks | 0.36     | 0.48           | 30 | .635            |
| Intercept (random) | 14.64    |                |    |                 |

<sup>a</sup> The estimate of the random effect represents the standard deviation of the intercept provided differences between individuals

**Table S17.** LME for ankle joint range of motion as a function of blocks and step height ( $R^2 = 0.94$ )

| Variable           | Estimate | <i>t</i> -stat | DF | <i>p</i> -value |
|--------------------|----------|----------------|----|-----------------|
| Intercept          | 20.55    | 6.78           | 30 | < .001          |
| Step Height        | -0.02    | 0.02           | 30 | .983            |
| Blocks             | -0.23    | 1.02           | 30 | .317            |
| Step Height*Blocks | 0.17     | 0.53           | 30 | .598            |
| Intercept (random) | 5.86     |                |    |                 |

<sup>a</sup> The estimate of the random effect represents the standard deviation of the intercept provided differences between individuals

**Table S18.** LME for execution time as a function of blocks and step height ( $R^2 = 0.99$ )

| Variable           | Estimate | <i>t</i> -stat | DF | <i>p</i> -value |
|--------------------|----------|----------------|----|-----------------|
| Intercept          | 32.91    | 7.78           | 30 | < .001          |
| Step Height        | 4.20     | 1.41           | 30 | .170            |
| Blocks             | -0.08    | 0.13           | 30 | .898            |
| Step Height*Blocks | -1.48    | 1.66           | 30 | .107            |
| Intercept (random) | 7.23     |                |    |                 |

<sup>a</sup> The estimate of the random effect represents the standard deviation of the intercept provided differences between individuals

### Within-trial Exploration

#### Descriptive Tables

**Table S19.** Recurrence of the PCA-aRQA (%) of each participant during a block of ten movements (B) and step height (S)

| Part. | B1S1 | B2S1 | B3S1 | B4S1 | B5S1 | B1S2 | B2S2 | B3S2 | B4S2 | B5S2 |
|-------|------|------|------|------|------|------|------|------|------|------|
| 1     | 2.36 | 1.89 | 1.29 | 1.46 | 1.41 | 1.32 | 1.70 | 2.60 | 1.97 | 2.07 |
| 2     | 2.08 | 1.80 | -    | 1.73 | 1.87 | 1.49 | 2.10 | 1.63 | 1.31 | 1.76 |
| 3     | 1.75 | 2.08 | 1.59 | 1.88 | 1.54 | 1.92 | 1.67 | 2.96 | 1.95 | 1.79 |
| 4     | -    | -    | 1.80 | -    | -    | -    | 1.84 | 1.92 | 2.25 | 1.89 |

**Table S20.** Recurrence of the cRQA (%) of each participant during a block of ten movements (B) and step height (S)

| Part. | B1S1 | B2S1 | B3S1 | B4S1 | B5S1 | B1S2 | B2S2 | B3S2 | B4S2 | B5S2 |
|-------|------|------|------|------|------|------|------|------|------|------|
| 1     | 1.18 | 1.99 | 1.78 | 2.77 | 0.60 | 2.80 | 1.61 | 3.68 | 1.12 | 1.25 |
| 2     | 1.35 | 5.68 | -    | 1.69 | 0.63 | 8.49 | 3.09 | 1.18 | 1.61 | 0.92 |
| 3     | 0.05 | 0.87 | 1.60 | 2.11 | 1.65 | 0.84 | 1.81 | 2.69 | 1.83 | 2.86 |
| 4     | -    | -    | 6.51 | -    | -    | -    | 2.40 | 0.90 | 1.39 | 1.24 |

**Table S21.** Recurrence of the mdRQA (%) of each participant during a block of ten movements (B) and step height (S)

| Part. | B1S1 | B2S1 | B3S1 | B4S1 | B5S1 | B1S2 | B2S2 | B3S2 | B4S2 | B5S2 |
|-------|------|------|------|------|------|------|------|------|------|------|
| 1     | 1.65 | 2.04 | 1.98 | 1.54 | 1.75 | 1.92 | 1.76 | 1.79 | 1.75 | 1.33 |
| 2     | 1.75 | 1.72 | -    | 1.97 | 1.38 | 2.40 | 2.29 | 2.21 | 1.67 | 1.81 |
| 3     | 1.95 | 1.74 | 1.91 | 2.16 | 2.16 | 2.36 | 2.26 | 1.90 | 1.46 | 1.96 |
| 4     | -    | -    | 1.84 | -    | -    | -    | 3.22 | 1.51 | 1.82 | 2.03 |

**Table S22.** Determinism of the PCA-aRQA (%) of each participant during a block of ten movements (B) and step height (S)

| Part. | B1S1  | B2S1  | B3S1  | B4S1  | B5S1  | B1S2  | B2S2  | B3S2  | B4S2  | B5S2  |
|-------|-------|-------|-------|-------|-------|-------|-------|-------|-------|-------|
| 1     | 99.99 | 100   | 99.98 | 99.98 | 99.98 | 99.97 | 99.99 | 99.99 | 99.98 | 99.99 |
| 2     | 99.98 | 99.99 | -     | 99.98 | 100   | 99.98 | 99.99 | 99.98 | 99.97 | 99.98 |
| 3     | 99.96 | 99.98 | 99.99 | 99.98 | 99.98 | 99.99 | 99.99 | 99.99 | 99.99 | 99.98 |
| 4     | -     | -     | 99.99 | -     | -     | -     | 99.98 | 99.93 | 99.92 | 99.66 |

**Table S23.** Determinism of the cRQA (%) of each participant during a block of ten movements (B) and step height (S)

| Part. | B1S1  | B2S1  | B3S1  | B4S1  | B5S1  | B1S2  | B2S2  | B3S2  | B4S2  | B5S2  |
|-------|-------|-------|-------|-------|-------|-------|-------|-------|-------|-------|
| 1     | 99.95 | 99.95 | 99.96 | 99.96 | 99.90 | 99.98 | 99.95 | 99.97 | 99.90 | 99.90 |
| 2     | 99.97 | 99.99 | -     | 99.97 | 99.96 | 99.99 | 99.98 | 99.97 | 99.97 | 99.94 |
| 3     | 99.93 | 99.97 | 99.97 | 99.99 | 99.98 | 99.98 | 99.98 | 99.99 | 99.98 | 99.99 |
| 4     | -     | -     | 99.99 | -     | -     | -     | 99.94 | 99.92 | 99.96 | 99.94 |

**Table S24.** Determinism of the mdRQA (%) of each participant during a block of ten movements (B) and step height (S)

| Part. | B1S1  | B2S1  | B3S1  | B4S1  | B5S1  | B1S2  | B2S2  | B3S2  | B4S2  | B5S2  |
|-------|-------|-------|-------|-------|-------|-------|-------|-------|-------|-------|
| 1     | 98.65 | 99.17 | 98.77 | 98.94 | 98.86 | 98.67 | 98.72 | 98.85 | 98.91 | 98.33 |
| 2     | 99.35 | 99.41 | -     | 99.19 | 99.10 | 99.68 | 99.30 | 99.28 | 99.31 | 98.91 |
| 3     | 99.74 | 99.73 | 99.67 | 99.79 | 99.76 | 99.86 | 99.87 | 99.87 | 99.77 | 99.72 |
| 4     | -     | -     | 99.31 | -     | -     | -     | 99.21 | 98.08 | 98.15 | 98.69 |

**Table S25.** Entropy of the PCA-aRQA (bits/bin) of each participant during a block of ten movements (B) and step height (S)

| Part. | B1S1 | B2S1 | B3S1 | B4S1 | B5S1 | B1S2 | B2S2 | B3S2 | B4S2 | B5S2 |
|-------|------|------|------|------|------|------|------|------|------|------|
| 1     | 4.04 | 4.19 | 3.77 | 3.94 | 3.89 | 4.01 | 4.15 | 4.28 | 4.15 | 3.99 |
| 2     | 3.99 | 4.10 | -    | 4.15 | 4.02 | 3.90 | 4.14 | 3.95 | 3.89 | 3.96 |
| 3     | 3.62 | 3.88 | 3.99 | 4.04 | 4    | 4    | 4.08 | 4.29 | 4.24 | 4.29 |
| 4     | -    | -    | 4.10 | -    | -    | -    | 3.90 | 3.59 | 3.57 | 2.96 |

**Table S26.** Entropy of the cRQA (bits/bin) of each participant during a block of ten movements (B) and step height (S)

| Part. | B1S1 | B2S1 | B3S1 | B4S1 | B5S1 | B1S2 | B2S2 | B3S2 | B4S2 | B5S2 |
|-------|------|------|------|------|------|------|------|------|------|------|
| 1     | 3.51 | 3.45 | 3.61 | 3.50 | 3.19 | 3.78 | 3.48 | 3.86 | 3.24 | 3.34 |
| 2     | 3.74 | 4.47 | -    | 3.70 | 3.37 | 4.65 | 3.95 | 3.54 | 3.87 | 3.37 |
| 3     | 3.13 | 3.73 | 4.01 | 4.16 | 4.12 | 4.02 | 4.26 | 4.50 | 4.25 | 4.29 |
| 4     | -    | -    | 4.61 | -    | -    | -    | 3.90 | 3.32 | 3.82 | 3.32 |

**Table S27.** Entropy of the mdRQA (bits/bin) of each participant during a block of ten movements (B) and step height (S)

| Part. | B1S1 | B2S1 | B3S1 | B4S1 | B5S1 | B1S2 | B2S2 | B3S2 | B4S2 | B5S2 |
|-------|------|------|------|------|------|------|------|------|------|------|
| 1     | 2.29 | 2.64 | 2.34 | 2.43 | 2.36 | 2.36 | 2.39 | 2.45 | 2.55 | 2.32 |
| 2     | 2.72 | 2.69 | -    | 2.59 | 2.53 | 3.10 | 2.80 | 2.67 | 2.64 | 2.49 |
| 3     | 3.18 | 3.09 | 3.11 | 3.46 | 3.42 | 3.52 | 3.45 | 3.57 | 3.27 | 3.18 |
| 4     | -    | -    | 2.68 | -    | -    | -    | 2.67 | 2.03 | 2.08 | 2.22 |

**Table S28.** LMAX of PCA-aRQA of each participant during a block of ten movements (B) and step height (S)

| Part. | B1S1  | B2S1  | B3S1  | B4S1  | B5S1  | B1S2  | B2S2  | B3S2  | B4S2  | B5S2  |
|-------|-------|-------|-------|-------|-------|-------|-------|-------|-------|-------|
| 1     | 42.61 | 58.35 | 53.65 | 45.26 | 39.76 | 54.16 | 62.09 | 68.46 | 43.97 | 43.95 |
| 2     | 31.31 | 37.22 | -     | 40.55 | 33.31 | 30.41 | 41.66 | 34.72 | 38.31 | 34.77 |
| 3     | 26.06 | 29.93 | 40.60 | 37.38 | 38.09 | 33.36 | 40.70 | 39.47 | 40.76 | 48.09 |
| 4     | -     | -     | 36.34 | -     | -     | -     | 31.08 | 25.39 | 24.40 | 13.90 |

**Table S29.** LMAX of cRQA of each participant during a block of ten movements (B) and step height (S)

| Part. | B1S1  | B2S1  | B3S1  | B4S1  | B5S1  | B1S2  | B2S2  | B3S2  | B4S2  | B5S2  |
|-------|-------|-------|-------|-------|-------|-------|-------|-------|-------|-------|
| 1     | 16.35 | 15.37 | 17.76 | 17.04 | 13.37 | 21.50 | 16.68 | 20.83 | 12.50 | 14.34 |
| 2     | 20.42 | 38.98 | -     | 19.80 | 15.31 | 48.06 | 23.12 | 17.10 | 22    | 15.04 |
| 3     | 13.03 | 18.58 | 24.33 | 29.24 | 28.43 | 24.99 | 31.37 | 37.94 | 30.27 | 33.03 |
| 4     | -     | -     | 42.78 | -     | -     | -     | 21.60 | 14.03 | 19.98 | 13.05 |

**Table S30.** LMAX of mdRQA of each participant during a block of ten movements (B) and step height (S)

| Part. | B1S1  | B2S1  | B3S1  | B4S1  | B5S1  | B1S2  | B2S2  | B3S2  | B4S2  | B5S2  |
|-------|-------|-------|-------|-------|-------|-------|-------|-------|-------|-------|
| 1     | 5.80  | 7.82  | 5.93  | 6.39  | 5.90  | 6.15  | 6.32  | 6.49  | 7.15  | 5.97  |
| 2     | 7.70  | 7.72  | -     | 7.02  | 6.65  | 10.50 | 8.30  | 7.44  | 7.20  | 6.57  |
| 3     | 11.74 | 10.57 | 11.07 | 15.14 | 14.26 | 15.43 | 14.77 | 17.03 | 12.62 | 11.56 |
| 4     | -     | -     | 7.540 | -     | -     | -     | 7.47  | 4.78  | 5.19  | 5.38  |

**Table S31.** Laminarity of PCA-aRQA of each participant during a block of ten movements (B) and step height (S)

| Part. | B1S1 | B2S1 | B3S1 | B4S1 | B5S1 | B1S2 | B2S2 | B3S2 | B4S2 | B5S2 |
|-------|------|------|------|------|------|------|------|------|------|------|
| 1     | 0.48 | 0.48 | 0.46 | 0.47 | 0.46 | 0.46 | 0.47 | 0.48 | 0.48 | 0.47 |
| 2     | 0.48 | 0.48 | -    | 0.48 | 0.48 | 0.48 | 0.48 | 0.47 | 0.47 | 0.47 |
| 3     | 0.48 | 0.48 | 0.48 | 0.48 | 0.48 | 0.49 | 0.48 | 0.49 | 0.49 | 0.48 |
| 4     | -    | -    | 0.48 | -    | -    | -    | 0.47 | 0.43 | 0.47 | 0.43 |

**Table S32.** Laminarity of cRQA of each participant during a block of ten movements (B) and step height (S)

| Part. | B1S1 | B2S1 | B3S1 | B4S1 | B5S1 | B1S2 | B2S2 | B3S2 | B4S2 | B5S2 |
|-------|------|------|------|------|------|------|------|------|------|------|
| 1     | 0.66 | 0.65 | 0.60 | 0.60 | 0.61 | 0.66 | 0.68 | 0.59 | 0.63 | 0.56 |
| 2     | 0.64 | 0.59 | -    | 0.57 | 0.52 | 0.51 | 0.51 | 0.56 | 0.43 | 0.51 |
| 3     | 0.91 | 0.52 | 0.57 | 0.61 | 0.59 | 0.44 | 0.51 | 0.44 | 0.46 | 0.42 |
| 4     | -    | -    | 0.48 | -    | -    | -    | 0.42 | 0.32 | 0.48 | 0.49 |

**Table S33.** Laminarity of mdRQA of each participant during a block of ten movements (B) and step height (S)

| Part. | B1S1 | B2S1 | B3S1 | B4S1 | B5S1 | B1S2 | B2S2 | B3S2 | B4S2 | B5S2 |
|-------|------|------|------|------|------|------|------|------|------|------|
| 1     | 0.54 | 0.49 | 0.44 | 0.39 | 0.45 | 0.44 | 0.44 | 0.39 | 0.45 | 0.46 |
| 2     | 0.53 | 0.49 | -    | 0.46 | 0.49 | 0.48 | 0.49 | 0.47 | 0.51 | 0.51 |
| 3     | 0.38 | 0.44 | 0.46 | 0.47 | 0.52 | 0.55 | 0.45 | 0.40 | 0.50 | 0.52 |
| 4     | -    | -    | 0.45 | -    | -    | -    | 0.42 | 0.48 | 0.45 | 0.40 |

### Linear Mixed Models

**Table S34.** LME for recurrence from PCA-aRQA as a function of blocks and step height ( $R^2 = 0.16$ )

| Variable           | Estimate       | <i>t</i> -stat | DF | <i>p</i> -value |
|--------------------|----------------|----------------|----|-----------------|
| Intercept          | 2.11           | 10.91          | 30 | < .001          |
| Step Height        | -0.37          | 1.43           | 30 | .164            |
| Blocks             | -0.12          | 1.98           | 30 | .057            |
| Step Height*Blocks | 0.17           | 2.13           | 30 | .041            |
| Intercept (random) | 0 <sup>a</sup> |                |    |                 |

<sup>a</sup> The estimate of the random effect represents the standard deviation of the intercept provided differences between individuals

**Table S35.** LME for recurrence from cRQA as a function of blocks and step height ( $R^2 = 0.10$ )

| Variable           | Estimate | <i>t</i> -stat | DF | <i>p</i> -value |
|--------------------|----------|----------------|----|-----------------|
| Intercept          | 2.17     | 2.21           | 30 | .035            |
| Step Height        | 1.68     | 1.25           | 30 | .221            |
| Blocks             | -0.05    | 0.15           | 30 | .878            |
| Step Height*Blocks | -0.49    | 1.22           | 30 | .234            |



Intercept (random) 0<sup>a</sup>

<sup>a</sup> The estimate of the random effect represents the standard deviation of the intercept provided differences between individuals

**Table S36.** LME for recurrence from mdRQA as a function of blocks and step height ( $R^2 = 0.24$ )

| Variable           | Estimate       | <i>t</i> -stat | DF | <i>p</i> -value |
|--------------------|----------------|----------------|----|-----------------|
| Intercept          | 1.83           | 10.15          | 30 | < .001          |
| Step Height        | 0.65           | 2.62           | 30 | .014            |
| Blocks             | ~ <sup>a</sup> | 0.03           | 30 | .975            |
| Step Height*Blocks | -0.17          | 2.24           | 30 | .032            |
| Intercept (random) | 0 <sup>b</sup> |                |    |                 |

<sup>a</sup> The value was small up to 5<sup>th</sup> decimal case. <sup>b</sup> The estimate of the random effect represents the standard deviation of the intercept provided differences between individuals

**Table S37.** LME for determinism from PCA-aRQA as a function of blocks and step height ( $R^2 = 0.26$ )

| Variable           | Estimate          | <i>t</i> -stat | DF | <i>p</i> -value |
|--------------------|-------------------|----------------|----|-----------------|
| Intercept          | 99.97             | 3171.10        | 30 | < .001          |
| Step Height        | 0.04              | 0.90           | 30 | .377            |
| Blocks             | ~ <sup>a</sup>    | 0.05           | 30 | .958            |
| Step Height*Blocks | -0.02             | 1.41           | 30 | .170            |
| Intercept (random) | 0.02 <sup>b</sup> |                |    |                 |

<sup>a</sup> The value was small up to 5<sup>th</sup> decimal case. <sup>b</sup> The estimate of the random effect represents the standard deviation of the intercept provided differences between individuals

**Table S38.** LME for determinism from cRQA as a function of blocks and step height ( $R^2 = 0.33$ )

| Variable           | Estimate          | <i>t</i> -stat | DF | <i>p</i> -value |
|--------------------|-------------------|----------------|----|-----------------|
| Intercept          | 99.97             | 7057.80        | 30 | < .001          |
| Step Height        | 0.02              | 1.30           | 30 | .203            |
| Blocks             | ~ <sup>a</sup>    | 0.30           | 30 | .767            |
| Step Height*Blocks | ~ <sup>a</sup>    | 1.51           | 30 | .142            |
| Intercept (random) | 0.01 <sup>b</sup> |                |    |                 |

<sup>a</sup> The value was small up to 5<sup>th</sup> decimal case. <sup>b</sup> The estimate of the random effect represents the standard deviation of the intercept provided differences between individuals

**Table S39.** LME for determinism from mdRQA as a function of blocks and step height ( $R^2 = 0.78$ )

| Variable           | Estimate          | <i>t</i> -stat | DF | <i>p</i> -value |
|--------------------|-------------------|----------------|----|-----------------|
| Intercept          | 99.25             | 392.76         | 30 | < .001          |
| Step Height        | 0.15              | 0.76           | 30 | .454            |
| Blocks             | 0.01              | 0.32           | 30 | .749            |
| Step Height*Blocks | 0.08              | 1.40           | 30 | .173            |
| Intercept (random) | 0.41 <sup>a</sup> |                |    |                 |

<sup>a</sup> The estimate of the random effect represents the standard deviation of the intercept provided differences between individuals

**Table S40.** LME for entropy from PCA-aRQA as a function of blocks and step height ( $R^2 = 0.24$ )

| Variable           | Estimate          | <i>t</i> -stat | DF | <i>p</i> -value |
|--------------------|-------------------|----------------|----|-----------------|
| Intercept          | 3.88              | 26.12          | 30 | < .001          |
| Step Height        | 0.19              | 1.08           | 30 | .291            |
| Blocks             | 0.02              | 0.43           | 30 | .673            |
| Step Height*Blocks | -0.05             | 1.01           | 30 | .321            |
| Intercept (random) | 0.14 <sup>a</sup> |                |    |                 |

<sup>a</sup> The estimate of the random effect represents the standard deviation of the intercept provided differences between individuals

**Table S41.** LME for entropy from cRQA as a function of blocks and step height ( $R^2 = 0.24$ )

| Variable           | Estimate          | <i>t</i> -stat | DF | <i>p</i> -value |
|--------------------|-------------------|----------------|----|-----------------|
| Intercept          | 3.73              | 15.87          | 30 | < .001          |
| Step Height        | 0.48              | 1.61           | 30 | .117            |
| Blocks             | 0.01              | 0.17           | 30 | .866            |
| Step Height*Blocks | -0.13             | 1.48           | 30 | .149            |
| Intercept (random) | 0.17 <sup>a</sup> |                |    |                 |

<sup>a</sup> The estimate of the random effect represents the standard deviation of the intercept provided differences between individuals

**Table S42.** LME for entropy from mdRQA as a function of blocks and step height ( $R^2 = 0.87$ )

| Variable           | Estimate          | <i>t</i> -stat | DF | <i>p</i> -value |
|--------------------|-------------------|----------------|----|-----------------|
| Intercept          | 2.65              | 12.34          | 30 | < .001          |
| Step Height        | 0.33              | 2.42           | 30 | .022            |
| Blocks             | 0.01              | 0.35           | 30 | .727            |
| Step Height*Blocks | -0.10             | 2.37           | 30 | .024            |
| Intercept (random) | 0.38 <sup>a</sup> |                |    |                 |

<sup>a</sup> The estimate of the random effect represents the standard deviation of the intercept provided differences between individuals

**Table S43.** LME for LMAX from PCA-aRQA as a function of blocks and step height ( $R^2 = 0.59$ )

| Variable           | Estimate          | <i>t</i> -stat | DF | <i>p</i> -value |
|--------------------|-------------------|----------------|----|-----------------|
| Intercept          | 34.44             | 5.67           | 30 | < .001          |
| Step Height        | 7.88              | 1.36           | 30 | .185            |
| Blocks             | 0.67              | 0.52           | 30 | .605            |
| Step Height*Blocks | -1.77             | 1.02           | 30 | .317            |
| Intercept (random) | 8.60 <sup>a</sup> |                |    |                 |

<sup>a</sup> The estimate of the random effect represents the standard deviation of the intercept provided differences between individuals

**Table S44.** LME for LMAX from cRQA as a function of blocks and step height ( $R^2 = 0.09$ )

| Variable           | Estimate       | <i>t</i> -stat | DF | <i>p</i> -value |
|--------------------|----------------|----------------|----|-----------------|
| Intercept          | 21.27          | 4.08           | 30 | < .001          |
| Step Height        | 9.75           | 1.37           | 30 | .182            |
| Blocks             | 0.26           | 0.17           | 30 | .870            |
| Step Height*Blocks | -2.84          | 1.33           | 30 | .193            |
| Intercept (random) | 0 <sup>a</sup> |                |    |                 |

<sup>a</sup> The estimate of the random effect represents the standard deviation of the intercept provided differences between individuals

**Table S45.** LME for LMAX from mdrQA as a function of blocks and step height ( $R^2 = 0.87$ )

| Variable           | Estimate          | <i>t</i> -stat | DF | <i>p</i> -value |
|--------------------|-------------------|----------------|----|-----------------|
| Intercept          | 7.56              | 4.57           | 30 | < .001          |
| Step Height        | 3.06              | 2.94           | 30 | .006            |
| Blocks             | 0.19              | 0.82           | 30 | .421            |
| Step Height*Blocks | -0.83             | 2.64           | 30 | .013            |
| Intercept (random) | 2.92 <sup>a</sup> |                |    |                 |

<sup>a</sup> The estimate of the random effect represents the standard deviation of the intercept provided differences between individuals

**Table S46.** LME for Laminarity from PCA-aRQA as a function of blocks and step height ( $R^2 = 0.46$ )

| Variable           | Estimate          | <i>t</i> -stat | DF | <i>p</i> -value |
|--------------------|-------------------|----------------|----|-----------------|
| Intercept          | 47.98             | 65.85          | 30 | < .001          |
| Step Height        | -0.25             | 0.32           | 30 | .752            |
| Blocks             | -0.18             | 1.04           | 30 | .305            |
| Step Height*Blocks | -0.02             | 0.09           | 30 | .931            |
| Intercept (random) | 0.88 <sup>a</sup> |                |    |                 |

<sup>a</sup> The estimate of the random effect represents the standard deviation of the intercept provided differences between individuals

**Table S47.** LME for Laminarity from cRQA as a function of blocks and step height ( $R^2 = 0.51$ )

| Variable           | Estimate          | <i>t</i> -stat | DF | <i>p</i> -value |
|--------------------|-------------------|----------------|----|-----------------|
| Intercept          | 68.98             | 13.74          | 30 | < .001          |
| Step Height        | -16.35            | 2.70           | 30 | .011            |
| Blocks             | -3.23             | 2.43           | 30 | .021            |
| Step Height*Blocks | 2.48              | 1.37           | 30 | .181            |
| Intercept (random) | 4.65 <sup>a</sup> |                |    |                 |

<sup>a</sup> The estimate of the random effect represents the standard deviation of the intercept provided differences between individuals

**Table S48.** LME for Laminarity from mdRQA as a function of blocks and step height ( $R^2 = 0.69$ )

| Variable           | Estimate       | <i>t</i> -stat | DF | <i>p</i> -value |
|--------------------|----------------|----------------|----|-----------------|
| Intercept          | 47.55          | 17.96          | 30 | < .001          |
| Step Height        | -1.47          | 0.41           | 30 | .687            |
| Blocks             | -0.28          | 0.35           | 30 | .731            |
| Step Height*Blocks | 0.36           | 0.33           | 30 | .743            |
| Intercept (random) | 0 <sup>a</sup> |                |    |                 |

<sup>a</sup> The estimate of the random effect represents the standard deviation of the intercept provided differences between individuals

### Between-trial Exploration

#### Descriptive Tables

**Table S49.** Area of knee and hip joint values (at peak foot height) of each participant per block of ten movements (B) and step height (S)

| Part. | B1S1  | B2S1   | B3S1   | B4S1   | B5S1   | B1S2   | B2S2   | B3S2   | B4S2   | B5S2   |
|-------|-------|--------|--------|--------|--------|--------|--------|--------|--------|--------|
| 1     | 85.03 | 138.45 | 40.23  | 53.11  | 39.15  | 109.57 | 78.96  | 40.02  | 70.03  | 82.99  |
| 2     | 64.48 | 128.27 | -      | 193.77 | 254.48 | 98.39  | 223.94 | 119.47 | 109.3  | 232.26 |
| 3     | 202.5 | 207.76 | 213.69 | 163.97 | 207.51 | 468.12 | 115.53 | 311.04 | 281.44 | 158.19 |
| 4     | -     | -      | 135.49 | -      | -      | -      | 60.07  | 52.33  | 30.77  | 159.3  |

**Table S50.** Variance along the equivalent space of knee and hip joint values (at peak foot height) of each participant per block of ten movements (B) and step height (S)

| Part. | B1S1  | B2S1  | B3S1  | B4S1  | B5S1  | B1S2   | B2S2  | B3S2  | B4S2  | B5S2  |
|-------|-------|-------|-------|-------|-------|--------|-------|-------|-------|-------|
| 1     | 7.08  | 17.48 | 1.82  | 10.48 | 2.69  | 15.54  | 5.79  | 2.49  | 8.15  | 7.54  |
| 2     | 4.47  | 7.54  | -     | 12.93 | 55.09 | 5.85   | 23.28 | 9.41  | 18.73 | 17.88 |
| 3     | 83.32 | 44.79 | 39.46 | 40.5  | 27.51 | 107.77 | 34.81 | 96.59 | 59.02 | 44.65 |
| 4     | -     | -     | 17.28 | -     | -     | -      | 16.07 | 12.1  | 9.62  | 45.57 |

**Table S51.** Variance along the orthogonal space of knee and hip joint values (at peak foot height) of each participant per block of ten movements (B) and step height (S)

| Part. | B1S1 | B2S1  | B3S1  | B4S1 | B5S1  | B1S2  | B2S2  | B3S2  | B4S2  | B5S2  |
|-------|------|-------|-------|------|-------|-------|-------|-------|-------|-------|
| 1     | 9.30 | 7.66  | 6.26  | 4.19 | 3.93  | 15.01 | 18.84 | 5     | 34.7  | 9.93  |
| 2     | 6.39 | 24.32 | -     | 49.9 | 55.44 | 11.77 | 16.23 | 16.48 | 11.01 | 35.98 |
| 3     | 3.41 | 6.72  | 10.98 | 5.30 | 27.44 | 14.09 | 4     | 9.89  | 9.22  | 5.02  |
| 4     | -    | -     | 7.64  | -    | -     | -     | 1.57  | 1.57  | 0.980 | 4.26  |

**Table S52.** Tolerance-cost of knee and hip joint values (at peak foot height) of each participant per block of ten movements (B) and step height (S)

| Part. | B1S1 | B2S1 | B3S1 | B4S1 | B5S1 | B1S2 | B2S2 | B3S2 | B4S2 | B5S2 |
|-------|------|------|------|------|------|------|------|------|------|------|
| 1     | 0.44 | 0.22 | 0.43 | 0.42 | 0.11 | 0.72 | 1.22 | 0.17 | 2.34 | 0.78 |
| 2     | 0.02 | 0.83 | -    | 1.78 | 1.30 | 0.36 | 0.10 | 0.62 | 0.28 | 0.72 |

|   |      |      |      |      |      |      |      |      |      |      |
|---|------|------|------|------|------|------|------|------|------|------|
| 3 | 0.02 | 0.50 | 1.47 | 0.25 | 3.63 | 0.85 | 0.65 | 0.03 | 1.16 | 1.19 |
| 4 | -    | -    | 0.34 | -    | -    | -    | 0.18 | 0.19 | 0.07 | 0.04 |

**Table S53.** Number of jumps in the trial-to-trial change of knee and hip joint values (at peak foot height) of each participant per block of ten movements (B) and step height (S)

| Part. | B1S1 | B2S1 | B3S1 | B4S1 | B5S1 | B1S2 | B2S2 | B3S2 | B4S2 | B5S2 |
|-------|------|------|------|------|------|------|------|------|------|------|
| 1     | 1    | 1    | 0    | 0    | 1    | 1    | 0    | 2    | 1    | 1    |
| 2     | 1    | 1    | -    | 1    | 1    | 1    | 1    | 0    | 0    | 0    |
| 3     | 1    | 0    | 0    | 0    | 1    | 0    | 0    | 0    | 1    | 0    |
| 4     | -    | -    | 0    | -    | -    | -    | 0    | 0    | 0    | 1    |

### Linear Mixed Models

**Table S54.** LME for area of knee and hip joint values (at peak foot height) as a function of blocks and step height ( $R^2 = 0.44$ )

| Variable           | Estimate           | <i>t</i> -stat | DF | <i>p</i> -value |
|--------------------|--------------------|----------------|----|-----------------|
| Intercept          | 108.45             | 2.09           | 30 | .045            |
| Step Height        | 61.27              | 1.06           | 30 | .296            |
| Blocks             | 7.82               | 0.62           | 30 | .542            |
| Step Height*Blocks | -15.69             | 0.91           | 30 | .370            |
| Intercept (random) | 59.54 <sup>a</sup> |                |    |                 |

<sup>a</sup> The estimate of the random effect represents the standard deviation of the intercept provided differences between individuals

**Table S55.** LME for variance along the equivalent space of knee and hip joint values (at peak foot height) as a function of blocks and step height ( $R^2 = 0.55$ )

| Variable           | Estimate           | <i>t</i> -stat | DF | <i>p</i> -value |
|--------------------|--------------------|----------------|----|-----------------|
| Intercept          | 25.36              | 1.76           | 30 | .087            |
| Step Height        | 7.76               | 0.52           | 30 | .608            |
| Blocks             | -0.84              | 0.25           | 30 | .801            |
| Step Height*Blocks | -0.75              | 0.17           | 30 | .867            |
| Intercept (random) | 18.48 <sup>a</sup> |                |    |                 |

<sup>a</sup> The estimate of the random effect represents the standard deviation of the intercept provided differences between individuals

**Table S56.** LME for variance along the orthogonal space of knee and hip joint values (at peak foot height) as a function of blocks and step height ( $R^2 = 0.42$ )

| Variable           | Estimate          | <i>t</i> -stat | DF | <i>p</i> -value |
|--------------------|-------------------|----------------|----|-----------------|
| Intercept          | -1.41             | 0.20           | 30 | .841            |
| Step Height        | 9.99              | 1.22           | 30 | .233            |
| Blocks             | 5.20              | 2.88           | 30 | .007            |
| Step Height*Blocks | -4.25             | 1.73           | 30 | .093            |
| Intercept (random) | 7.03 <sup>a</sup> |                |    |                 |

<sup>a</sup> The estimate of the random effect represents the standard deviation of the intercept provided differences between individuals

**Table S57.** LME for tolerance-cost of knee and hip joint values (at peak foot height) as a function of blocks and step height ( $R^2 = 0.19$ )

| Variable           | Estimate <sup>a</sup> | <i>t</i> -stat | DF | <i>p</i> -value |
|--------------------|-----------------------|----------------|----|-----------------|
| Intercept          | -0.21                 | 0.53           | 30 | .600            |
| Step Height        | 0.65                  | 1.17           | 30 | .252            |
| Blocks             | 0.33                  | 2.72           | 30 | .011            |
| Step Height*Blocks | -0.28                 | 1.66           | 30 | .107            |
| Intercept (random) | 0.67 <sup>b</sup>     |                |    |                 |

<sup>a</sup> The data was multiplied by 100 for better visualization; <sup>b</sup>The estimate of the random effect represents the standard deviation of the intercept provided differences between individuals

**Table S58.** GLME for chance of jumps in the trial-to-trial change of knee and hip joint values (at peak foot height) as a function of blocks and step height ( $R^2 = 0.69$ )

| Variable           | Estimate       | <i>t</i> -stat | DF | <i>p</i> -value |
|--------------------|----------------|----------------|----|-----------------|
| Intercept          | 0.80           | 0.61           | 30 | .544            |
| Step Height        | -1.24          | 0.72           | 30 | .480            |
| Blocks             | -0.14          | 0.38           | 30 | .920            |
| Step Height*Blocks | 0.17           | 0.34           | 30 | .734            |
| Intercept (random) | 1 <sup>a</sup> |                |    |                 |

<sup>a</sup> The estimate of the random effect represents the standard deviation of the intercept provided differences between individuals
